# Supplementary material
Source: MDPI journal article supplement (https://www.mdpi.com/2227-9040/11/1/61)
Supplement: s1 [file s1]

## Supplementary

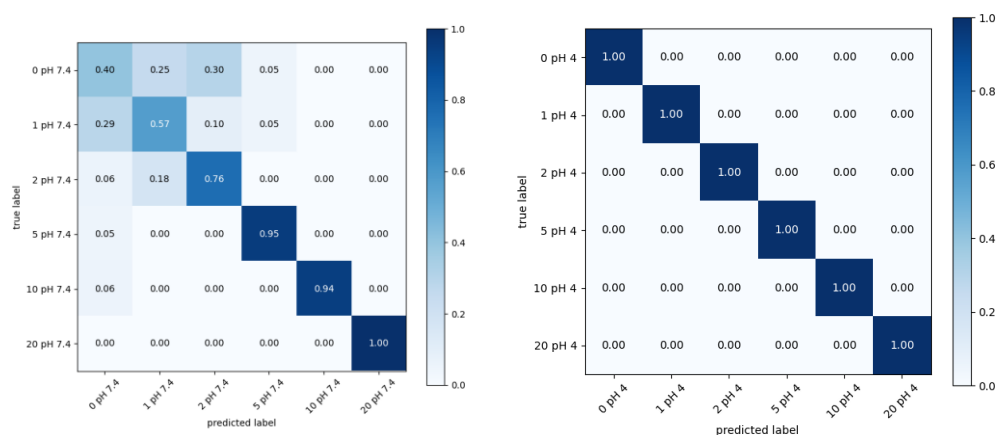

**Figure S1.** Confusion matrix for six classes of copper ions concentration in MEM at the same pH condition (pH 7.4 on the left, pH 4 on the right) using DT as classifier.

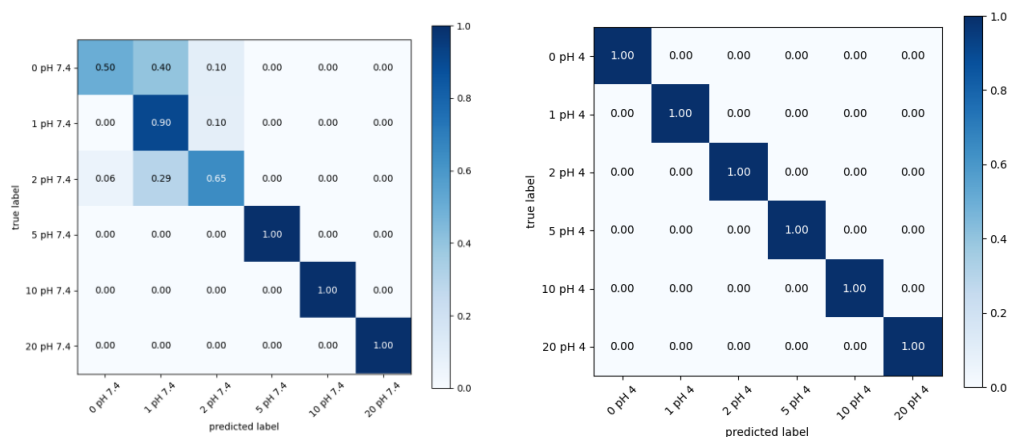

**Figure S2.** Confusion matrix for six classes of copper ions concentration in MEM at the same pH condition (pH 7.4 on the left, pH 4 on the right) using NB as classifier.

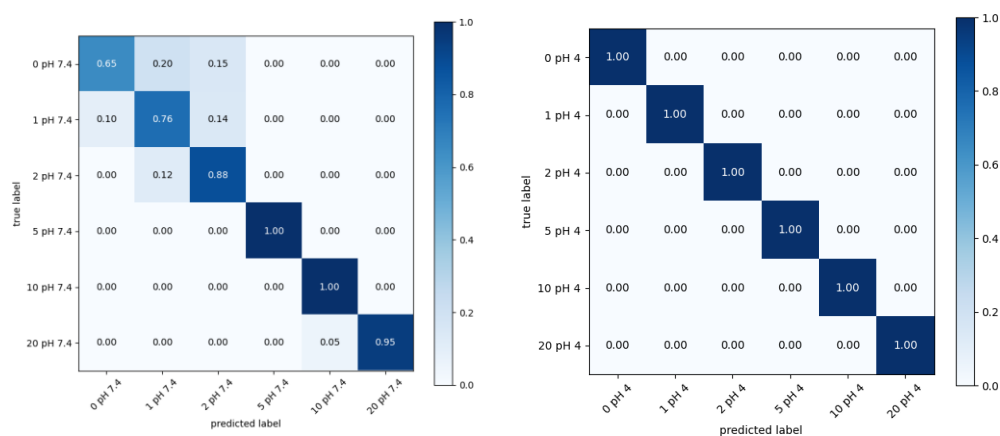

**Figure S3.** Confusion matrix for six classes of copper ions concentration in MEM at the same pH condition (pH 7.4 on the left, pH 4 on the right) using SVM as classifier.

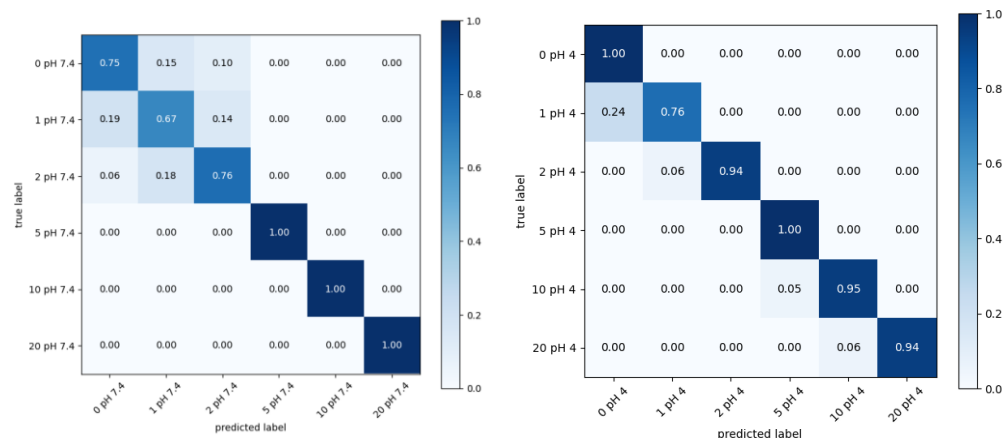

**Figure S4.** Confusion matrix for six classes of copper ions concentration in MEM at the same pH condition (pH 7.4 on the left, pH 4 on the right) using ANN as classifier.

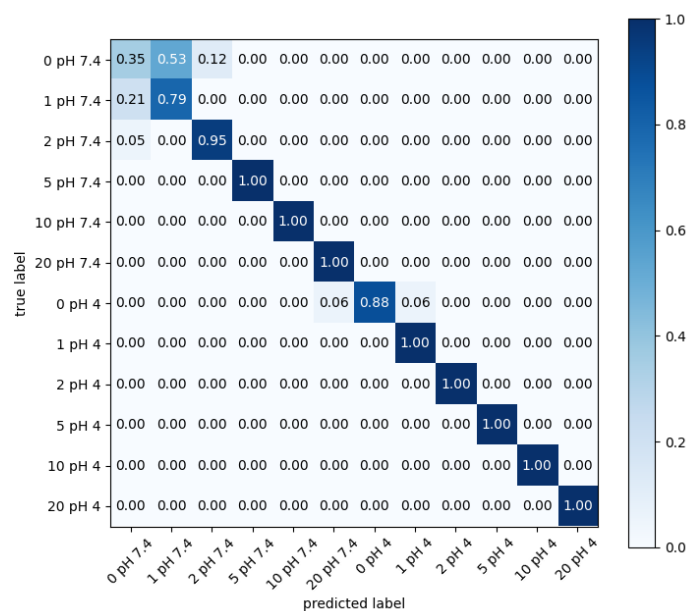

**Figure S5.** Confusion matrix for twelve classes of copper ions concentration in DMEM at different pH conditions using DT as classifier.

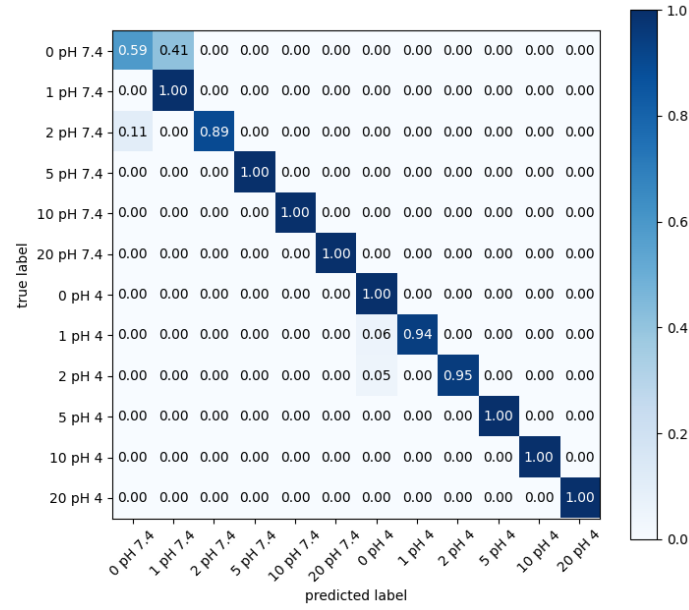

**Figure S6.** Confusion matrix for twelve classes of copper ions concentration in DMEM at different pH conditions using NB as classifier.

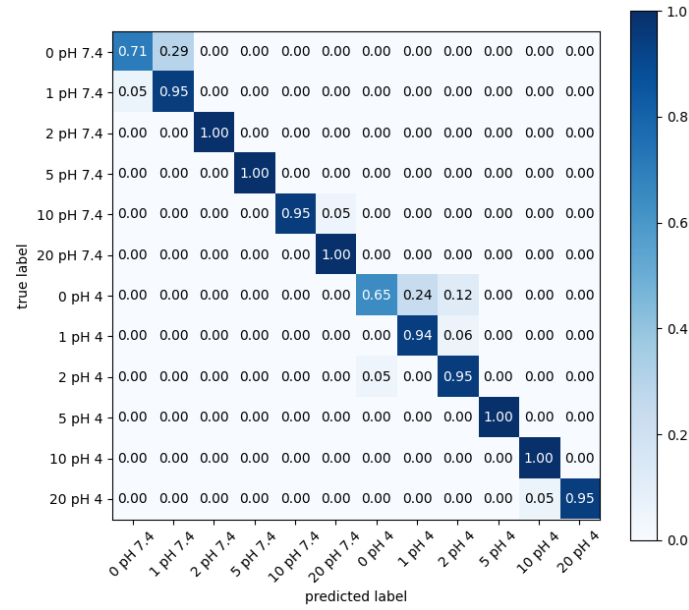

**Figure S7.** Confusion matrix for twelve classes of copper ions concentration in DMEM at different pH conditions using SVM as classifier.

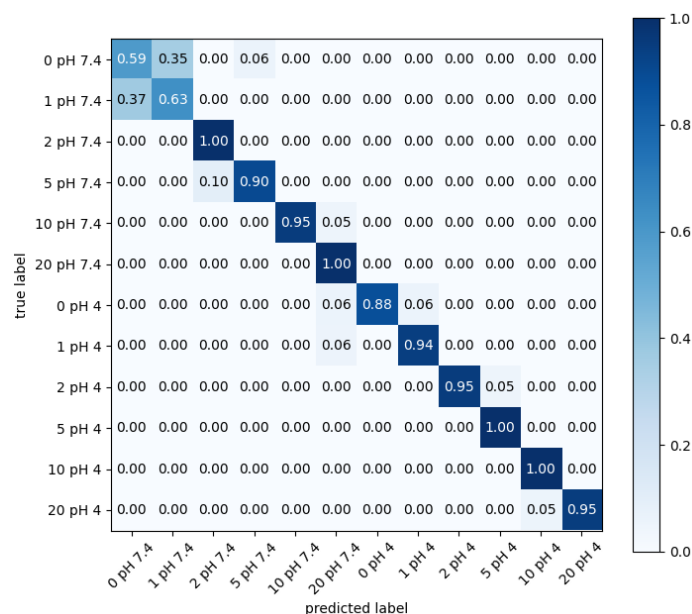

**Figure S8.** Confusion matrix for twelve classes of copper ions concentration in DMEM at different pH conditions using ANN as classifier.

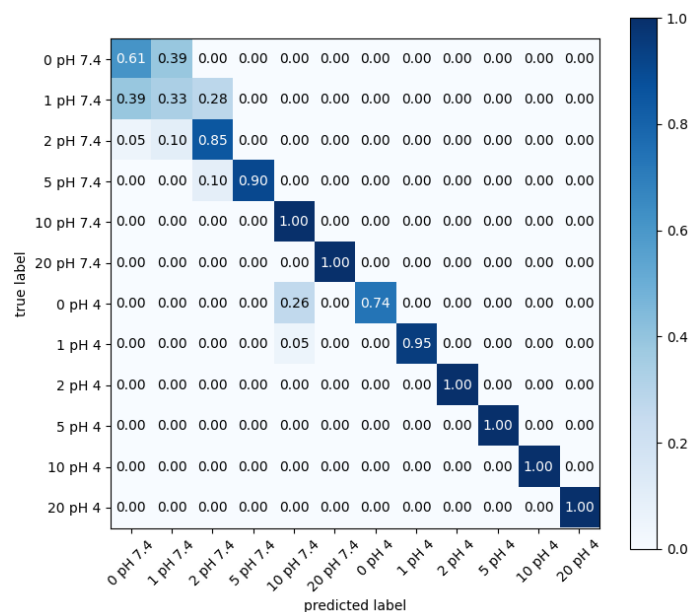

**Figure S9.** Confusion matrix for twelve classes of copper ions concentration in F12 at different pH conditions using DT as classifier.

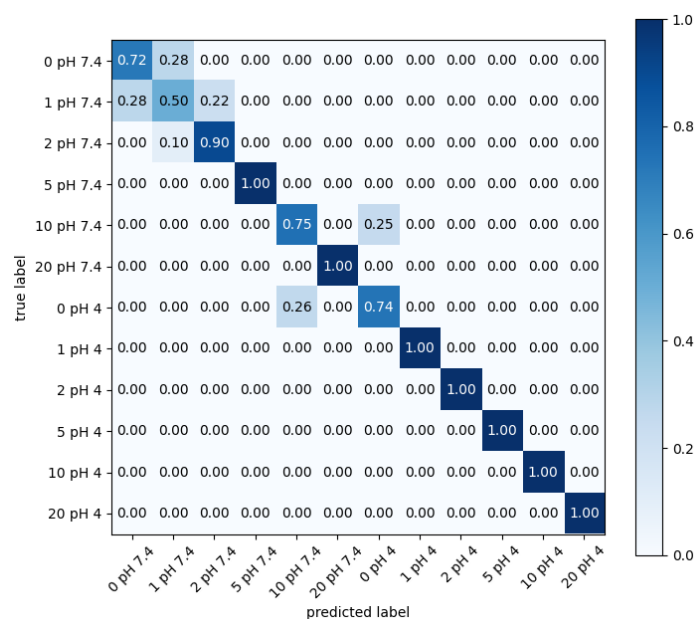

**Figure S10.** Confusion matrix for twelve classes of copper ions concentration in F12 at different pH conditions using NB as classifier.

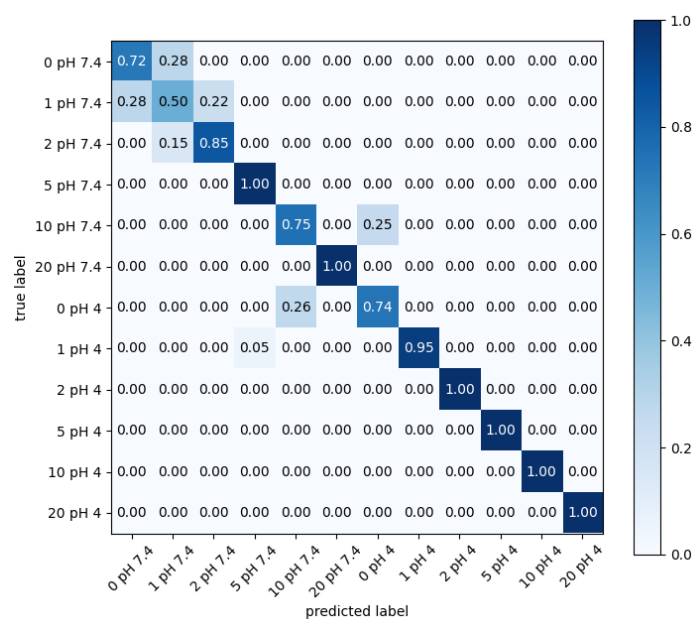

**Figure S11.** Confusion matrix for twelve classes of copper ions concentration in F12 at different pH conditions using SVM as classifier.

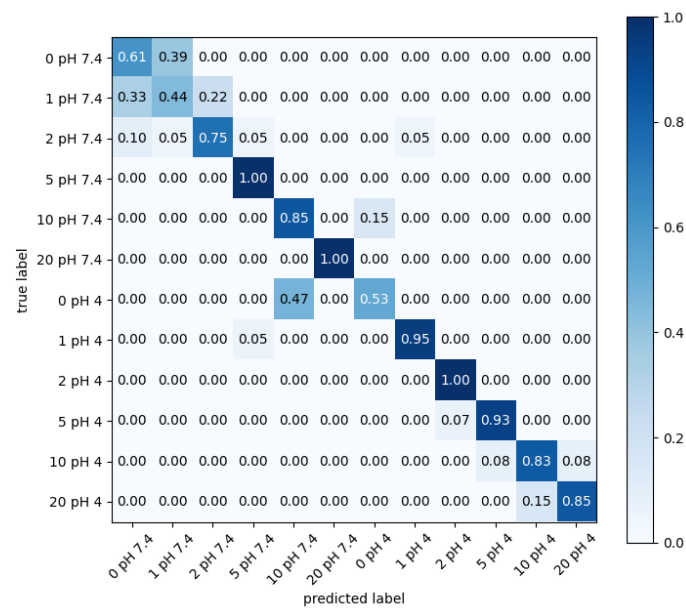

**Figure S12.** Confusion matrix for twelve classes of copper ions concentration in F12 at different pH conditions using ANN as classifier.
